# Supplementary material for: Comprehensive Characterization and Relative Quantification of α-Amylase/Trypsin Inhibitors from Wheat Cultivars by Targeted HPLC-MS/MS
Source: Foods. 2020 Oct 13;9(10):1448. doi: 10.3390/foods9101448 (PMC7600490; doi:10.3390/foods9101448)
Supplement: Supplementary file 1 [file foods-09-01448-s001.zip › Selection of peptides-28-08-2020.xlsx]

## Sheet: ATIs
	Possible candidates / First test	Detected	Final peptides selected	Allocation	Specificity	Re-check via blast oncemore
P01083 Alpha-amylase inhibitor 0.28 OS=Triticum aestivum OX=4565 GN=IMA1 PE=1 SV=3
MWMKTVFWGLLVFMLVATTMAVEYGARSHNSGPWSWCNPATGYKVSALTGCRAMVKLQCVGSQVPEAVLRDCCQQLADINNEWCRCGDLSSMLRSVYQELGVREGKEVLPGCRKEVMKLTAASVPEVCKVPIPNPSGDRAGVCYGDWAAYPDV
K.VSALTGCR.A [44, 51]	X	X	X	Quant	Specific	7 wheat entries with very similar sequences - Please see also the corresponding allignment in "VSALTGCR"
K.LQCVGSQVPEAVLR.D [56, 69]	X	X
R.DCCQQLADINNEWCR.C [70, 84]	X
R.CGDLSSMLR.S [85, 93]	X
R.SVYQELGVR.E [94, 102]	X	X
K.EVLPGCR.K [106, 112]	X	X
K.LTAASVPEVCK.V [118, 128]	X	X	X	Qual
K.VPIPNPSGDR.A [129, 138]	X	X	X	Quant	Specific	7 wheat entries with very similar sequences - Please see also the corresponding allignment in "VPIPNPSGDR"
R.AGVCYGDWAAYPDV.- [139, 152]	X
P17314 Alpha-amylase/trypsin inhibitor CM3 OS=Triticum aestivum OX=4565 PE=1 SV=1
MACKSSCSLLLLAAVLLSVLAAASASGSCVPGVAFRTNLLPHCRDYVLQQTCGTFTPGSKLPEWMTSASIYSPGKPYLAKLYCCQELAEISQQCRCEALRYFIALPVPSQPVDPRSGNVGESGLIDLPGCPREMQWDFVRLLVAPGQCNLATIHNVRYCPAVEQPLWI
R.TNLLPHCR.D [36, 43]	X	X	X	Quant	Specific	3 wheat entries with very similar sequences - Please see also the corresponding allignment in "TNLLPHCR"
R.DYVLQQTCGTFTPGSK.L [44, 59]	X	X
K.LPEWMTSASIYSPGKPYLAK.L [60, 79]	X
K.LYCCQELAEISQQCR.C [80, 94]	X	X
R.CEALR.Y [95, 99]	X	X	X	Qual
R.YFIALPVPSQPVDPR.S [100, 114]	X	X	X	Qual
R.SGNVGESGLIDLPGCPR.E [115, 131]	X	X	X	Qual
R.EMQWDFVR.L [132, 139]	X	X
R.LLVAPGQCNLATIHNVR.Y [140, 156]	X	X
R.YCPAVEQPLWI.- [157, 167]	X	X
P16850 Alpha-amylase/trypsin inhibitor CM1 OS=Triticum aestivum OX=4565 PE=1 SV=1
MASKSSISPLLLATVLVSVFAAATATGPYCYAGMGLPINPLEGCREYVAQQTCGISISGSAVSTEPGNTPRDRCCKELYDASQHCRCEAVRYFIGRRSDPNSSVLKDLPGCPREPQRDFAKVLVTSGHCNVMTVHNAPYCLGLDI
R.EYVAQQTCGISISGSAVSTEPGNTPR.D [45, 70]	X
K.ELYDASQHCR.C [76, 85]	X	X
R.CEAVR.Y [86, 90]	X	X	X	Qual
R.YFIGR.R [91, 95]	X	X	X	Qual
R.SDPNSSVLK.D [97, 105]	X	X	X	Quant	Specific	4 wheat entries with very similar sequences - Please see also the corresponding allignment in "SDPNSSVLK"
K.DLPGCPR.E [106, 112]	X	X	X	Qual
K.VLVTSGHCNVMTVHNAPYCLGLDI.- [121, 144]	X
P01085 Alpha-amylase inhibitor 0.19 OS=Triticum aestivum OX=4565 PE=1 SV=1
SGPWMCYPGQAFQVPALPACRPLLRLQCNGSQVPEAVLRDCCQQLAHISEWCRCGALYSMLDSMYKEHGAQEGQAGTGAFPRCRREVVKLTAASITAVCRLPIVVDASGDGAYVCKDVAAYPDA
R.LQCNGSQVPEAVLR.D [25, 38]	X	X
R.DCCQQLAHISEWCR.C [39, 52]	X
R.CGALYSMLDSMYK.E [53, 65]	X
K.EHGAQEGQAGTGAFPR.C [66, 81]	X	X
K.LTAASITAVCR.L [89, 99]	X	X	X	Quant	Specific	4 wheat entries with very similar sequences - Please see also the corresponding allignment in "LTAASITAVCR"; incl. P01084
R.LPIVVDASGDGAYVCK.D [100, 115]	X	X	X	Qual
K.DVAAYPDA.- [116, 123]	X	X	X	Qual
P01084 Alpha-amylase inhibitor 0.53 OS=Triticum aestivum OX=4565 PE=1 SV=1
SGPWMCYPGQAFQVPALPGCRPLLKLQCNGSQVPEAVLRDCCQQLADISEWPRCGALYSMLDSMYKEHGVSEGQAGTGAFPSCRREVVKLTAASITAVCRLPIVVDASGDGAYVCKDVAAYPDA
K.LQCNGSQVPEAVLR.D [25, 38]	X	X
R.DCCQQLADISEWPR.C [39, 52]	X
R.CGALYSMLDSMYK.E [53, 65]
K.EHGVSEGQAGTGAFPSCR.R [66, 83]	X
K.LTAASITAVCR.L [89, 99]	X	X	X	Quant	Specific	4 wheat entries with very similar sequences - Please see also the corresponding allignment in "LTAASITAVCR"; incl. P01085
R.LPIVVDASGDGAYVCK.D [100, 115]	X	X	X	Qual
K.DVAAYPDA.- [116, 123]	X	X	X	Qual
P16851 Alpha-amylase/trypsin inhibitor CM2 OS=Triticum aestivum OX=4565 PE=1 SV=2
MASKSSITHLLLAAVLVSVFAAAAATGPYCYPGMGLPSNPLEGCREYVAQQTCGVGIVGSPVSTEPGNTPRDRCCKELYDASQHCRCEAVRYFIGRTSDPNSGVLKDLPGCPREPQRDFAKVLVTPGHCNVMTVHNTPYCLGLDI
R.EYVAQQTCGVGIVGSPVSTEPGNTPR.D [45, 70]	X	X
K.ELYDASQHCR.C [76, 85]	X	X
R.CEAVR.Y [86, 90]	X	X	X	Qual
R.YFIGR.T [91, 95]	X	X	X	Qual
R.TSDPNSGVLK.D [96, 105]	X	X	X	Quant	Specific	4 wheat entries with very similar sequences - Please see also the corresponding allignment in "TSDPNSGVLK"
K.DLPGCPR.E [106, 112]	X	X	X	Qual
R.EPQR.D [113, 116]	X
R.DFAK.V [117, 120]	X
K.VLVTPGHCNVMTVHNTPYCLGLDI.- [121, 144]	X
P81496 Allergen C-C (Fragment) OS=Triticum aestivum OX=4565 PE=1 SV=1
SFREQCVPGREITYECLNACAEYAVRQ
R.EQCVPGR.E [3, 9]	X	X	X	Quant	Specific	3 wheat entries - Please see also the corresponding allignment in "EQCVPGR"
R.EITYECLNACAEYAVR.Q [10, 25]	X	X	X	Qual
Q43723 Trypsin/alpha-amylase inhibitor CMX1/CMX3 OS=Triticum aestivum OX=4565 PE=2 SV=1
MAFKHQLILSTAILLAVLAAASASFREQCVPGREITYESLNARREYAVRQTCGYYLSAERQKRRCCDELSKVPELCWCEVLRILMDRRVTKEGVVKGSLLQDMSRCKKLTREFIAGIVGRE
R.EQCVPGR.E [26, 32]	X	X	X	Quant	Specific	3 wheat entries - Please see also the corresponding allignment in "EQCVPGR"
R.EITYESLNAR.R [33, 42]	X					The peptide is also present in P81496 / Q43691
R.EYAVR.Q [44, 48]	X	X
R.QTCGYYLSAER.Q [49, 59]	X	X
K.VPELCWCEVLR.I [71, 81]	X
K.EGVVK.G [91, 95]	X
R.EFIAGIVGR.E [111, 119]	X	X	X	Quant	Specific	This peptide is also present in A0A4V1DXH0 / Q43691
						For comparison see allignment in "EFIAGIVGR"
P16852 Alpha-amylase/trypsin inhibitor CM17 (Fragment) OS=Triticum aestivum OX=4565 PE=1 SV=1
NEDCTPWTSTLIXPLPXCRNYVXXQAC
NEDCTPWTSTLITPLPSCR	X	X	X	Quant	Specific	For comparison see allignment in "NEDCTPWTSTLITPLPSCR"
						This peptide is also present inA0A3B6JQP1 / Q41540 (Please see further below)
P10846 Alpha-amylase inhibitor WDAI-3 (Fragment) OS=Triticum aestivum OX=4565 GN=IHA-B1-2 PE=1 SV=1
SGPWMCYPGYAFKVPALPGCRPVLLLQCNGSQVPEAVLRDCCQQ
-.SGPWMCYPGYAFK.V [0, 12]	X	X	X	Quant	Specific	This peptide is also present in Q4U199 (Please see further below)
Q4U199 (Q4U199_WHEAT)	?
P83207 Chymotrypsin inhibitor WCI OS=Triticum aestivum OX=4565 PE=1 SV=1
TSIYTCYEGVGLPVDPLQGCHYYVTSQTCGFVPLLPIEVMKDRCCRELAAISSNCRCEGLRVFIDRAFPPSQSQGGGPPQPPLAPRCPTEVKRDFARTLALPGQCNLPTIHGGPYCVFP
R.ELAAISSNCR.C [46, 55]	X	X	X	Quant	Specific	For comparison see allignment in "ELAAISSNCR"
R.CEGLR.V [56, 60]	X	X	X	Qual
R.VFIDR.A [61, 65]	X	X	X	Qual
R.AFPPSQSQGGGPPQPPLAPR.C [66, 85]	X
R.CPTEVK.R [86, 91]	X
R.TLALPGQCNLPTIHGGPYCVFP.- [97, 118]	X
P93602 PUP88 protein; member of trypsin/a-amylase inhibitors family from cereals OS=Triticum aestivum OX=4565 GN=PUP88 PE=2 SV=1
MASNHRRFLLSGAVLLSVLAAVAALESVEDECQPGVAFPHNALATCHTYVIKRVCGRGPSRPMLVKERCCRELAVVPDYCRCEALRVLMDGVRAEEGHVVEGRLGDRRDCPREAQREFAATLVTAAECNLPTVSGVGSTLGATGRWMTIELPK
R.VCGR.G [53, 56]	X	X
R.GPSRPMLVK.E [57, 65]	X
R.ELAVVPDYCR.C [71, 80]	X	X	X	Qual		For comparison see allignment in "ELAVVPDYCR"
R.CEALR.V [81, 85]	X	X	X	Quant	Specific	For comparison see corresponding allignments
R.VLMDGVR.A [86, 92]	X	X	X	Qual	Specific	For comparison see corresponding allignments
R.AEEGHVVEGR.L [93, 102]	X
R.LGDR.R [103, 106]	X
R.EAQR.E [112, 115]	X
R.EFAATLVTAAECNLPTVSGVGSTLGATGR.W [116, 144]	X
R.WMTIELPK.- [145, 152]	X	X	X	Quant	Specific	For comparison see corresponding allignments
P16159 Alpha-amylase/trypsin inhibitor CM16 OS=Triticum aestivum OX=4565 PE=1 SV=1
MASKSNCVLLLAAVLVSIFAAVAAIGNEDCTPWMSTLITPLPSCRDYVEQQACRIETPGSPYLAKQQCCGELANIPQQCRCQALRYFMGPKSRPDQSGLMELPGCPREVQMDFVRILVTPGYCNLTTVHNTPYCLAMEESQWS
R.DYVEQQACR.I [45, 53]	X	X	X	Qual	Specific	This peptide is present in A0A4P8DL87 / B5B0D5
R.IETPGSPYLAK.Q [54, 64]	X	X	X	Qual
K.QQCCGELANIPQQCR.C [65, 79]	X
R.CQALR.Y [80, 84]	X	X
R.YFMGPK.S [85, 90]	X	X	X	Quant	Specific	This peptide is present in A0A4P8DL87 / A0A3B6JQP1 / B5B0D5 / Q41540
K.SRPDQSGLMELPGCPR.E [91, 106]	X
R.EVQMDFVR.I [107, 114]	X	X	X	Quant	Specific	This peptide is present in A0A4P8DL87 / B5B0D5 / Q41450
Q41540 CM 17 protein OS=Triticum aestivum OX=4565 PE=2 SV=1
MASKSNYNLLFTALLVFIFAAVAAVGNEDCTPWTSTLITPLPSCRNYVEEQACRIEMPGPPYLAKQECCEQLANIPQQCRCQALRYFMGPKSRPDQSGLMELPGCPREVQMNFVPILVTPGYCNLTTVHNTPYCLGMEESQWS
R.NYVEEQACR.I [45, 53]	X	X	X	Quant	Specific	This peptide is present in A0A3B6JQP1
R.IEMPGPPYLAK.Q [54, 64]	X	X	X	Quant	Specific	This peptide is present in A0A3B6JQP1
R.YFMGPK.S [85, 90]	X	X	X	Qual	Specific	This peptide is present in A0A4P8DL87 / A0A3B6JQP1 / B5B0D5 / P16159
Q4U199 Dimeric alpha-amylase inhibitor OS=Triticum aestivum OX=4565 PE=4 SV=1
MLVATPIAAEYDAWSVNSGPWMCYPGYAFKVPALPGCRPVLKLQCNGSQVPEAVLRECCQQLADISEWCRCGALYSTLDSMYKEHGVQEGQAGTGAFPSCRREVVKLTAASITAVCKLPIVIDASGDGAYVCKGVAAYPDA
K.LTAASITAVCK.L [106, 116]	X	X	X	Quant	Specific	Please see blast results for SGPWMCYPGYAFKV
K.LPIVIDASGDGAYVCK.G [117, 132]	X	X	X	Qual
K.GVAAYPDA.- [133, 140]	X	X	X	Quant	Specific	Please see blast results for SGPWMCYPGYAFKV

## Sheet: VSALTGCR
97 hits altogether - 7 for wheat

## Sheet: VPIPNPSGDR
VPIPNPSGDR
Blast search: more than 25 hits with 100% identity; from these 7 are from wheat

## Sheet: TNLLPHCR
TNLLPHCR
4 entries with 100% Identity; 3 from wheat

## Sheet: SDPNSSVLK
SDPNSSVLK
6 hits with 100% identity; 4 from wheat

## Sheet: LTAASITAVCR
KLTAASITAVCRL
More than 50 entries with 100% identity -four hits for wheat

## Sheet: TSDPNSGVLK
RTSDPNSGVLKD
4 hits with 100% - 3 for wheat

## Sheet: EQCVPGR
REQCVPGRE
3 hits just for wheat

## Sheet: EFIAGIVGR
REFIAGIVGRE
14 hits with 100% identity; 6 for wheat

## Sheet: NEDCTPWTSTLITPLPSCR
NEDCTPWTSTLIXPLPXCR
4 hits with 100% identity, 3 for wheat

[truncated: 11 more sheets: SGPWMCYPGYAFKV , ELAAISSNCR, RELAVVPDYCRC, RCEALRV, WMTIELPK, RVLMDGVR, LTAASITAVCK,  IEMPGPPYLAK, GVAAYPDA, P16159-Q41540, Extended List of ATIS]
